# Supplementary material for: Graphene oxide-based boronate polymer brushes via surface initiated atom transfer radical polymerization for the selective enrichment of glycoproteins
Source: Royal Society of Chemistry journal article supplement (doi:10.1039/c6tb01489e), 2016-01-01
Supplement: c6tb01489e1.pdf [file c6tb01489e1.pdf]

Electronic supplementary information

**Graphene oxide-based boronate polymer brushes via surface initiated  
atom transfer radical polymerization for selective enrichment of  
glycoproteins**

**Xiangyang An,<sup>a</sup> Xiwen He,<sup>a</sup> Langxing Chen,<sup>\*ab</sup> and Yukui Zhang<sup>\*ac</sup>**

<sup>a</sup>Research Center for Analytical Sciences, College of Chemistry, Tianjin Key Laboratory of Biosensing and Molecular Recognition, State Key Laboratory of Medicinal Chemical Biology, Nankai University, Tianjin 300071, China

*Fax:* (+86) 22-2350-2458, *\*E-mail:* [lxchen@nankai.edu.cn](mailto:lxchen@nankai.edu.cn)

<sup>b</sup>Collaborative Innovation Center of Chemical Science and Engineering (Tianjin).

*\*E-mail:* [lxchen@nankai.edu.cn](mailto:lxchen@nankai.edu.cn)

Tel: 0086+0 22-23505091; Fax: 0086+0 22-23502458

<sup>c</sup>Dalian Institute of Chemical Physics, Chinese Academy of Sciences, Dalian 116011, P. R. China.

*\*E-mail:* [ykzhang@dicp.ac.cn](mailto:ykzhang@dicp.ac.cn)

Tel: 0086+411-84379560; Fax:0086+411-84379560

**Figure S1**

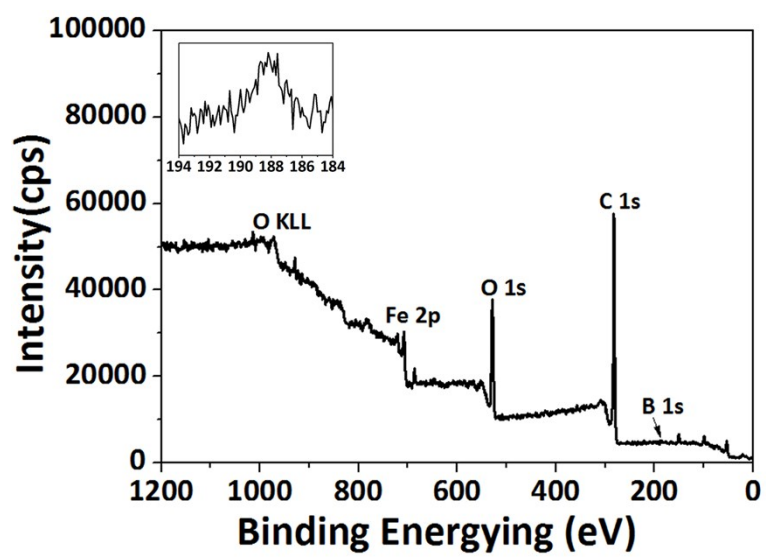

**Figure S1** XPS spectra of GO@PVPBA nanocomposite.

Figure S2

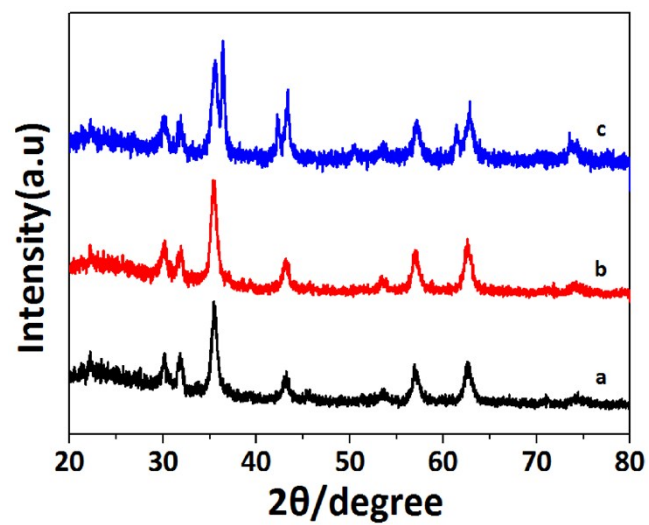

Figure S2 XRD patterns of GO@Fe<sub>3</sub>O<sub>4</sub> (a), GO@Br (b), and GO@PVPBA(c) nanocomposite.

Figure S3

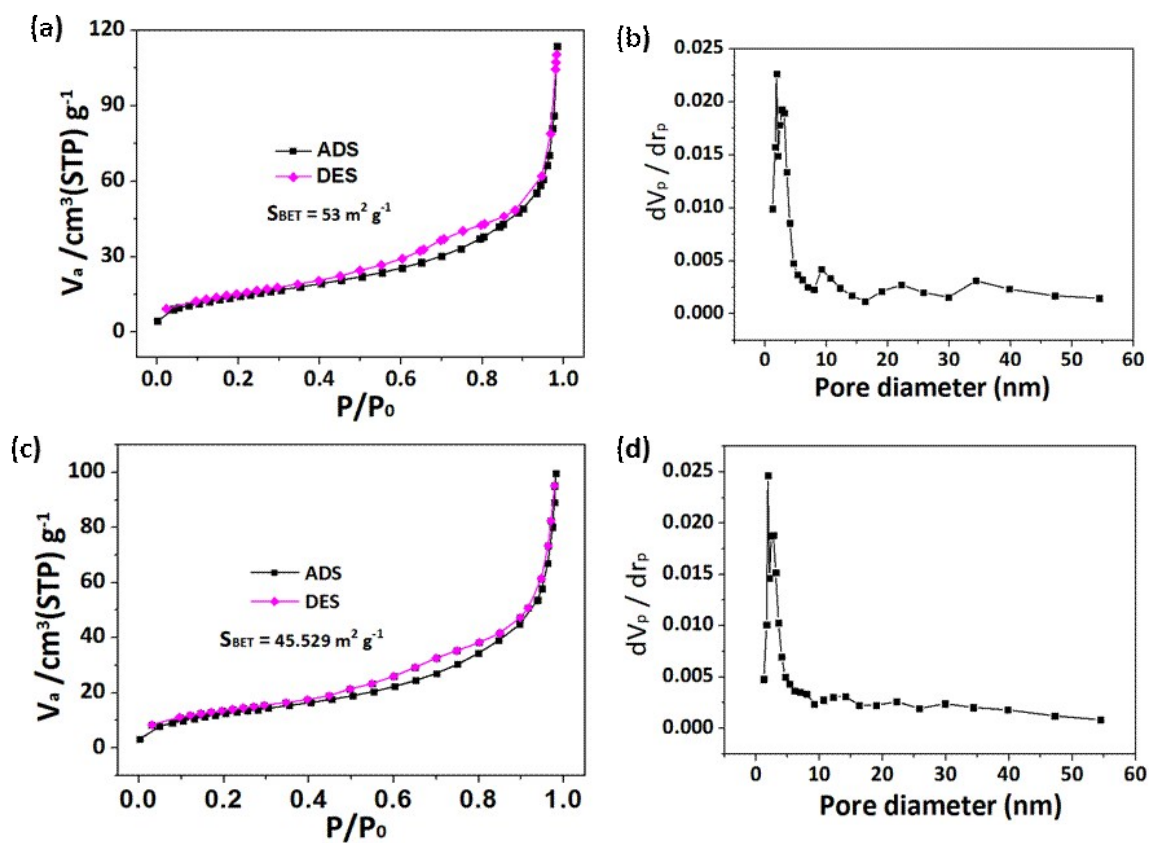

**Figure S3**  $N_2$  adsorption/desorption isotherms (at 77 K) of GO@Fe<sub>3</sub>O<sub>4</sub>(a), and GO@PVPBA (c) nanocomposites, pore size distribution of GO@Fe<sub>3</sub>O<sub>4</sub> (b), and GO@PVPBA (d) according to the Barrett–Joyner–Halenda (BJH) model.

**Figure S4**

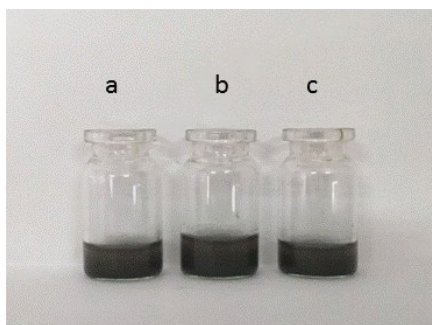

**Figure S4** The picture of GO@Fe<sub>3</sub>O<sub>4</sub> (a), GO@Br (b), and GO@PVPBA (c) nanocomposites dispersed in phosphate buffer after 3 min of ultrasonication.

**Figure S5**

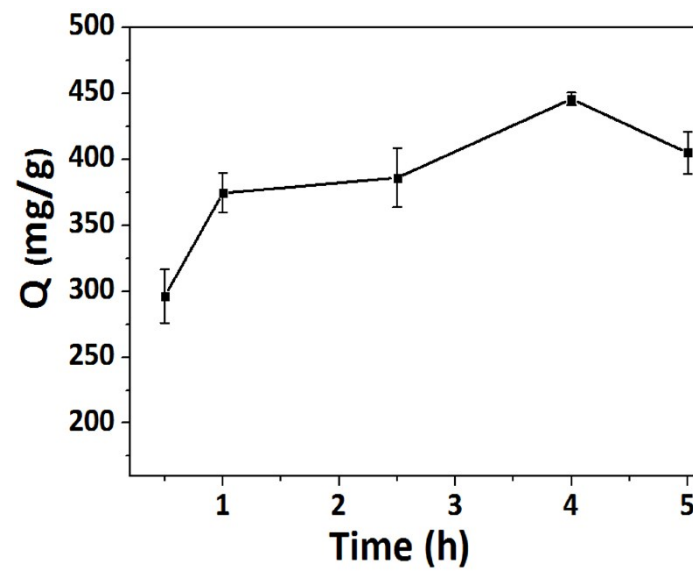

**Figure S5** Adsorption of Trf on GO@PVPBA with different incubation time at pH 9.0.

**Figure S6**

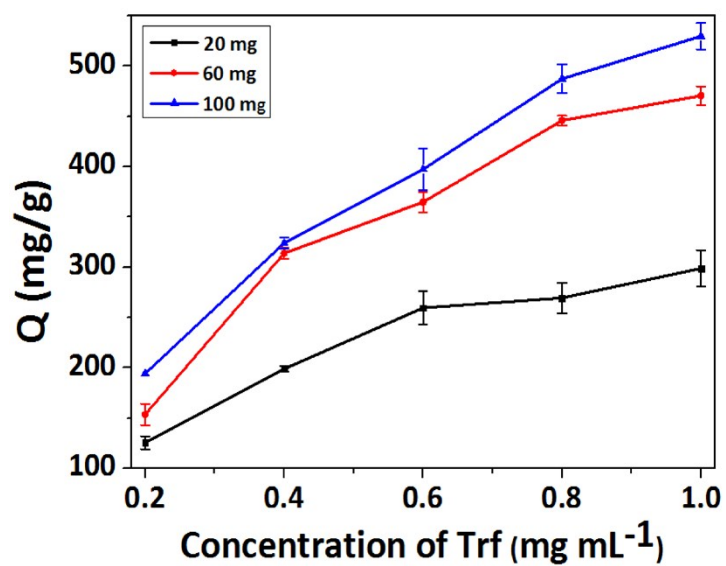

**Figure S6** Adsorption of Trf on GO@PVPBA with different concentrations of VPBA in the reaction mixture, and the incubation time of 4 h at pH 9.0.
